# Supplementary material for: Two Sides of a Coin: a Zika Virus Mutation Selected in Pregnant Rhesus Macaques Promotes Fetal Infection in Mice but at a Cost of Reduced Fitness in Nonpregnant Macaques and Diminished Transmissibility by Vectors
Source: PubMed Central journal article supplement (PMC7925200; doi:10.1128/jvi.01605-20), 2020-11-23
Supplement: JVI.01605-20-s0001.pdf [file JVI.01605-20-s0001.pdf]

## SUPPLEMENTAL TABLES

**Supplemental Table 1.** Primers used for Sanger sequencing ZIKV in this study.

| ZIKV Primer Name | Primer Sequence (5' to 3') |
|------------------|----------------------------|
| 28p              | CGACAGTTCGAGTTTGAAGCG      |
| 430p             | CCAGTGTCGGAATTGTTGGC       |
| 563n             | CCCCAGTGTGGTTGGAAAAG       |
| 904p             | GGCTTTTGGGAAGCTCAACG       |
| 1048n            | ACAACATCAACCCAGGTCCC       |
| 1200p            | CCAACACAAGGTGAAGCCTAC      |
| 1489n            | GGCGTTATCTCAACCTTCGC       |
| 1618p            | ACAAGGAGTGGTTCATGACA       |
| 1776n            | TGTGAACGGCTCCTTCTTGAC      |
| 1970p            | GTATGCAGGGACAGATGGACC      |
| 2204n            | TTTTCCGATGGTGCTGCCAC       |
| 2301p            | GGCAAGGGCATCCATCAAAT       |
| 2537n            | ACCGCATCTCGTTTCCTTCTT      |
| 2749p            | CGGTCGTTGTGGGATCTGTAA      |
| 2979n            | GAAATACCCCGAACCCGTGA       |
| 3246p            | CACCACAACACCAGAGAGGG       |
| 3393n            | TGTTGATCTCAGGGACGGT        |
| 3711p            | AAGCTTGCAATTCTGATGGGTG     |
| 3894n            | CAGTTTGCAGAAGGCACGAG       |
| 4144p            | CCTTGGGACTAACCGCTGTG       |
| 4299n            | TATCTGCTTTGGCGAACCTC       |
| 4634p            | GCCTGCTCCCAAGGAAGTAAA      |
| 4809n            | CAAGTCTCCCTTCACCGCTC       |
| 5197p            | ATCCTGGAGCTGGGAAAACC       |
| 5342n            | GTAACGCACTGGAAGCCCT        |
| 5814p            | CAAGAGTGGGACTTCGTCGTA      |
| 5924n            | GCCATCAAGTATGACCGGCT       |
| 6379p            | TGCTCAAACCGAGGTGGATG       |
| 6516n            | TCATGTGTCCTGGCAGTGTT       |
| 6878p            | CATGGTAGCAGTGGGTCTTCT      |
| 7063n            | ATGAGAGTTGTCAGAGCGGC       |
| 7451p            | CATCTCCAGTGCCGTTCTGC       |
| 7573n            | GCTGTGGAGGAGTTCCAGTAT      |
| 7925p            | CTGGAGTTACTACGCCGCC        |
| 8075n            | CGCCATGTGAAAGACGTCCA       |
| 8510p            | CGTTGAGAGGATCCGCAGTG       |
| 8649n            | GCCTGACAACCCCGTTTATG       |

|        |                       |
|--------|-----------------------|
| 9059p  | GGAATTTGGAAAGGCCAAGGG |
| 9206n  | TAATCCCAGCCCTTCAACACC |
| 9614p  | GCAGAGCAACGGATGGGATA  |
| 9763n  | GAGGGTTTCCACTCCTGTGT  |
| 10220p | TCTTATAGGGCACAGACCACG |
| 10365n | GTGTGGACCCTTCTTCACCC  |
| 10803n | CCATGGATTTCCCCACACCG  |

**Supplemental Table 2.** Deep sequencing data showing the percentage of reads that encode ZIKV I1404 in inocula and experimentally infected pregnant rhesus macaques. For most samples, a targeted sequencing approach flanking ZIKV polyprotein amino acid 1404 was used. <sup>a</sup>, <sup>b</sup> and <sup>c</sup> show data from different laboratories. <sup>a</sup> is The Scripps Research Institute, <sup>b</sup> is University of California San Francisco, and <sup>c</sup> is Lawrence Livermore National Laboratories. PR is Puerto Rico, WT is SPH2015, a Brazilian strain, KU321639, N/A is not applicable, DPI is day post inoculation, IV is intravenous, IA is intraamniotic, SC is subcutaneous.

| ANIMAL IDENTIFIER or INOCULUM | ZIKV STRAIN | INOCULATION ROUTE | FETAL OUTCOME | STUDY END POINT (DPI) | TISSUE                  | DPI | COVERAGE AT 1404 | % I1404 MUTANT (AUA) |
|-------------------------------|-------------|-------------------|---------------|-----------------------|-------------------------|-----|------------------|----------------------|
| Inoculum                      | PR 2015     | SC                | N/A           | N/A                   | N/A                     | N/A | 2242             | 0% <sup>a</sup>      |
| Inoculum                      | WT          | IV + IA           | N/A           | N/A                   | N/A                     | N/A | 5705             | 0.2% <sup>b</sup>    |
| Inoculum                      | WT          | IV + IA           | N/A           | N/A                   | N/A                     | N/A | 2296             | 1.3% <sup>a</sup>    |
| 5731                          | PR 2015     | SC                | Near term     | 125                   | Maternal plasma         | 5   | 2706             | 0% <sup>a</sup>      |
| 5731                          | PR 2015     | SC                | Near term     | 125                   | Maternal spleen         | 125 | 15               | 14% <sup>a</sup>     |
| 5388                          | WT          | IV + IA           | Death         | 7                     | Amniotic fluid          | 2   | 1175             | 25% <sup>b</sup>     |
| 5388                          | WT          | IV + IA           | Death         | 7                     | Amniotic fluid          | 7   | 2564             | 17% <sup>a</sup>     |
| 5388                          | WT          | IV + IA           | Death         | 7                     | Gestational Sac         | 7   | 8020             | 14% <sup>a</sup>     |
| 5388                          | WT          | IV + IA           | Death         | 7                     | Amniotic membrane       | 7   | 309              | 25% <sup>c</sup>     |
| 5388                          | WT          | IV + IA           | Death         | 7                     | Amniotic membrane       | 7   | 4492             | 28% <sup>a</sup>     |
| 5388                          | WT          | IV + IA           | Death         | 7                     | Placenta full thickness | 7   | 5477             | 5% <sup>a</sup>      |
| 5388                          | WT          | IV + IA           | Death         | 7                     | Vagina                  | 7   | 777              | 19% <sup>c</sup>     |
| 5388                          | WT          | IV + IA           | Death         | 7                     | Spleen                  | 7   | 6235             | 0% <sup>a</sup>      |
| 5388                          | WT          | IV + IA           | Death         | 7                     | Inguinal Lymph node     | 7   | 4332             | 0.1% <sup>a</sup>    |
| 5388                          | WT          | IV + IA           | Death         | 7                     | Fetal Lung              | 7   | 6236             | 0% <sup>a</sup>      |
| 5388                          | WT          | IV + IA           | Death         | 7                     | Fetal Intestine         | 7   | 21444            | 0% <sup>a</sup>      |
| 5388                          | WT          | IV + IA           | Death         | 7                     | Fetal Brain             | 7   | 4581             | 0.2% <sup>a</sup>    |
| 5592                          | WT          | IV + IA           | Death         | 14                    | Amniotic fluid          | 14  | 13               | 8% <sup>a</sup>      |
| 5592                          | WT          | IV + IA           | Death         | 14                    | Inguinal Lymph node     | 14  | 2389             | 0% <sup>a</sup>      |
| 5592                          | WT          | IV + IA           | Death         | 14                    | Amniotic membrane       | 14  | 7695             | 0% <sup>a</sup>      |
| 5592                          | WT          | IV + IA           | Death         | 14                    | Fetal intestine         | 14  | 9362             | 0.1% <sup>a</sup>    |
| 5592                          | WT          | IV + IA           | Death         | 14                    | Fetal kidney            | 14  | 6812             | 0.1% <sup>a</sup>    |

|      |              |         |           |     |                             |     |        |                   |
|------|--------------|---------|-----------|-----|-----------------------------|-----|--------|-------------------|
| 5592 | WT           | IV + IA | Death     | 14  | Fetal brain                 | 14  | 2849   | 0.1% <sup>a</sup> |
| 4817 | WT           | IV + IA | Near term | 105 | Amniotic fluid              | 2   | 8000   | 0% <sup>c</sup>   |
| 4817 | WT           | IV + IA | Near term | 105 | Amniotic fluid              | 14  | 438486 | 4% <sup>a</sup>   |
| 4817 | WT           | IV + IA | Near term | 105 | Amniotic fluid              | 21  | 2560   | 5% <sup>a</sup>   |
| 4817 | WT           | IV + IA | Near term | 105 | Vagina                      | 105 | 1232   | 9% <sup>c</sup>   |
| 5846 | WT           | IV + IA | Near term | 87  | Amniotic fluid              | 7   | 15869  | 13% <sup>a</sup>  |
| 5846 | WT           | IV + IA | Near term | 87  | Amniotic fluid              | 14  | 5439   | 12% <sup>a</sup>  |
| 5846 | WT           | IV + IA | Near term | 87  | Amniotic fluid              | 21  | 10045  | 35% <sup>a</sup>  |
| 5846 | WT           | IV + IA | Near term | 87  | Amniotic fluid              | 28  | 333    | 2% <sup>c</sup>   |
| 5846 | WT           | IV + IA | Near term | 87  | Amniotic membrane           | 87  | 217    | 7% <sup>c</sup>   |
| 5846 | WT           | IV + IA | Near term | 87  | Fetal seminal vesicle       | 87  | 557    | 3% <sup>c</sup>   |
| 5846 | WT           | IV + IA | Near term | 87  | Urine                       | 40  | 1929   | 11% <sup>c</sup>  |
| 5846 | WT           | IV + IA | Near term | 87  | Urine                       | 77  | 1725   | 37% <sup>c</sup>  |
| 5846 | WT           | IV + IA | Near term | 87  | Placenta                    | 87  | 2991   | 0% <sup>c</sup>   |
| 5846 | WT           | IV + IA | Near term | 87  | Fetal brain                 | 87  | 2800   | 0% <sup>c</sup>   |
| 5846 | WT           | IV + IA | Near term | 87  | Amniotic fluid              | 2   | 7842   | 0.3% <sup>a</sup> |
| 5207 | WT           | IV + IA | Near term | 65  | Amniotic fluid              | 2   | 8797   | 14% <sup>c</sup>  |
| 5207 | WT           | IV + IA | Near term | 65  | Placenta                    | 65  | 5130   | 4% <sup>c</sup>   |
| 5462 | WT + PR 2015 | IV + IA | Death     | 73  | Amniotic fluid              | 7   | 6151   | 0% <sup>a</sup>   |
| 5462 | WT           | IV + IA | Death     | 73  | Amniotic fluid              | 14  | 6686   | 0.4% <sup>a</sup> |
| 5462 | WT           | IV + IA | Death     | 73  | Fetal Lung                  | 70  | 5016   | 0% <sup>a</sup>   |
| 5507 | PR 2015      | SC      | Death     | 30  | Amniotic membrane           | 30  | 5052   | 0% <sup>a</sup>   |
| 5512 | PR 2015      | SC      | Near term | 121 | Amniotic membrane           | 121 | 5318   | 0% <sup>a</sup>   |
| 5803 | WT + PR 2015 | IV + IA | Death     | 42  | Fetal lung                  | 42  | 14467  | 0% <sup>a</sup>   |
| 5803 | WT+ PR 2015  | IV + IA | Death     | 42  | Fetal ileum                 | 42  | 7137   | 0% <sup>a</sup>   |
| 5803 | WT+ PR 2015  | IV + IA | Death     | 42  | Fetal kidney                | 42  | 12886  | 0% <sup>a</sup>   |
| 5803 | WT + PR 2015 | IV + IA | Death     | 42  | Fetal brain – parietal lobe | 42  | 5491   | 0.1% <sup>a</sup> |
| 5803 | WT + PR 2015 | IV + IA | Death     | 42  | Placenta full thickness     | 42  | 11923  | 0% <sup>a</sup>   |
| 5803 | WT + PR 2015 | IV + IA | Death     | 42  | Amniotic membrane           | 42  | 4935   | 0% <sup>a</sup>   |

**Supplemental Table 3.** Deep sequencing data showing the percentage of reads at ZIKV 1404 in non-pregnant rhesus macaques. '1:1 Mix' denotes an equal mixture of ZIKV M1404 and I1404. LN is lymph node. DPI is days post-inoculation. SC is subcutaneous. These same data are shown graphically in Figure 2E.

| <b>ANIMAL IDENTIFIER or INOCULUM</b> | <b>ZIKV STRAIN</b> | <b>INOCULATION ROUTE</b> | <b>TISSUE</b> | <b>DPI</b> | <b>NUCLEOTIDE COVERAGE AT 1404</b> | <b>% I1404 MUTANT</b> |
|--------------------------------------|--------------------|--------------------------|---------------|------------|------------------------------------|-----------------------|
| INOCULUM                             | 1:1 Mix            | N/A                      | N/A           | N/A        | 1013                               | 51%                   |
| 5123                                 | 1:1 Mix            | SC                       | Plasma        | 3          | 7920                               | 18%                   |
| 5123                                 | 1:1 Mix            | SC                       | Plasma        | 5          | 7                                  | 14%                   |
| 5123                                 | 1:1 Mix            | SC                       | Inguinal LN   | 15         | 1607                               | 32%                   |
| 5123                                 | 1:1 Mix            | SC                       | Mesenteric LN | 15         | 881                                | 22%                   |
| 5123                                 | 1:1 Mix            | SC                       | Spleen        | 15         | 170                                | 25%                   |
| 5779                                 | 1:1 Mix            | SC                       | Plasma        | 3          | 7922                               | 27%                   |
| 5779                                 | 1:1 Mix            | SC                       | Plasma        | 5          | 7888                               | 21%                   |
| 5779                                 | 1:1 Mix            | SC                       | Ileum         | 15         | 384                                | 9%                    |
| 5779                                 | 1:1 Mix            | SC                       | Inguinal LN   | 15         | 412                                | 50%                   |
| 5779                                 | 1:1 Mix            | SC                       | Mesenteric LN | 15         | 126                                | 45%                   |
| 5779                                 | 1:1 Mix            | SC                       | Spleen        | 15         | 496                                | 31%                   |
